# Supplementary material for: A population-based recurrence risk management study of patients with pT1 node-negative HER2+ breast cancer: a National Clinical Database study
Source: Springer Nature journal article supplement (doi:10.1007/s10549-019-05413-7), 2019-08-26

Supplementary Fig 1. Overall survival curves according to HER2 positivity in cohort 1

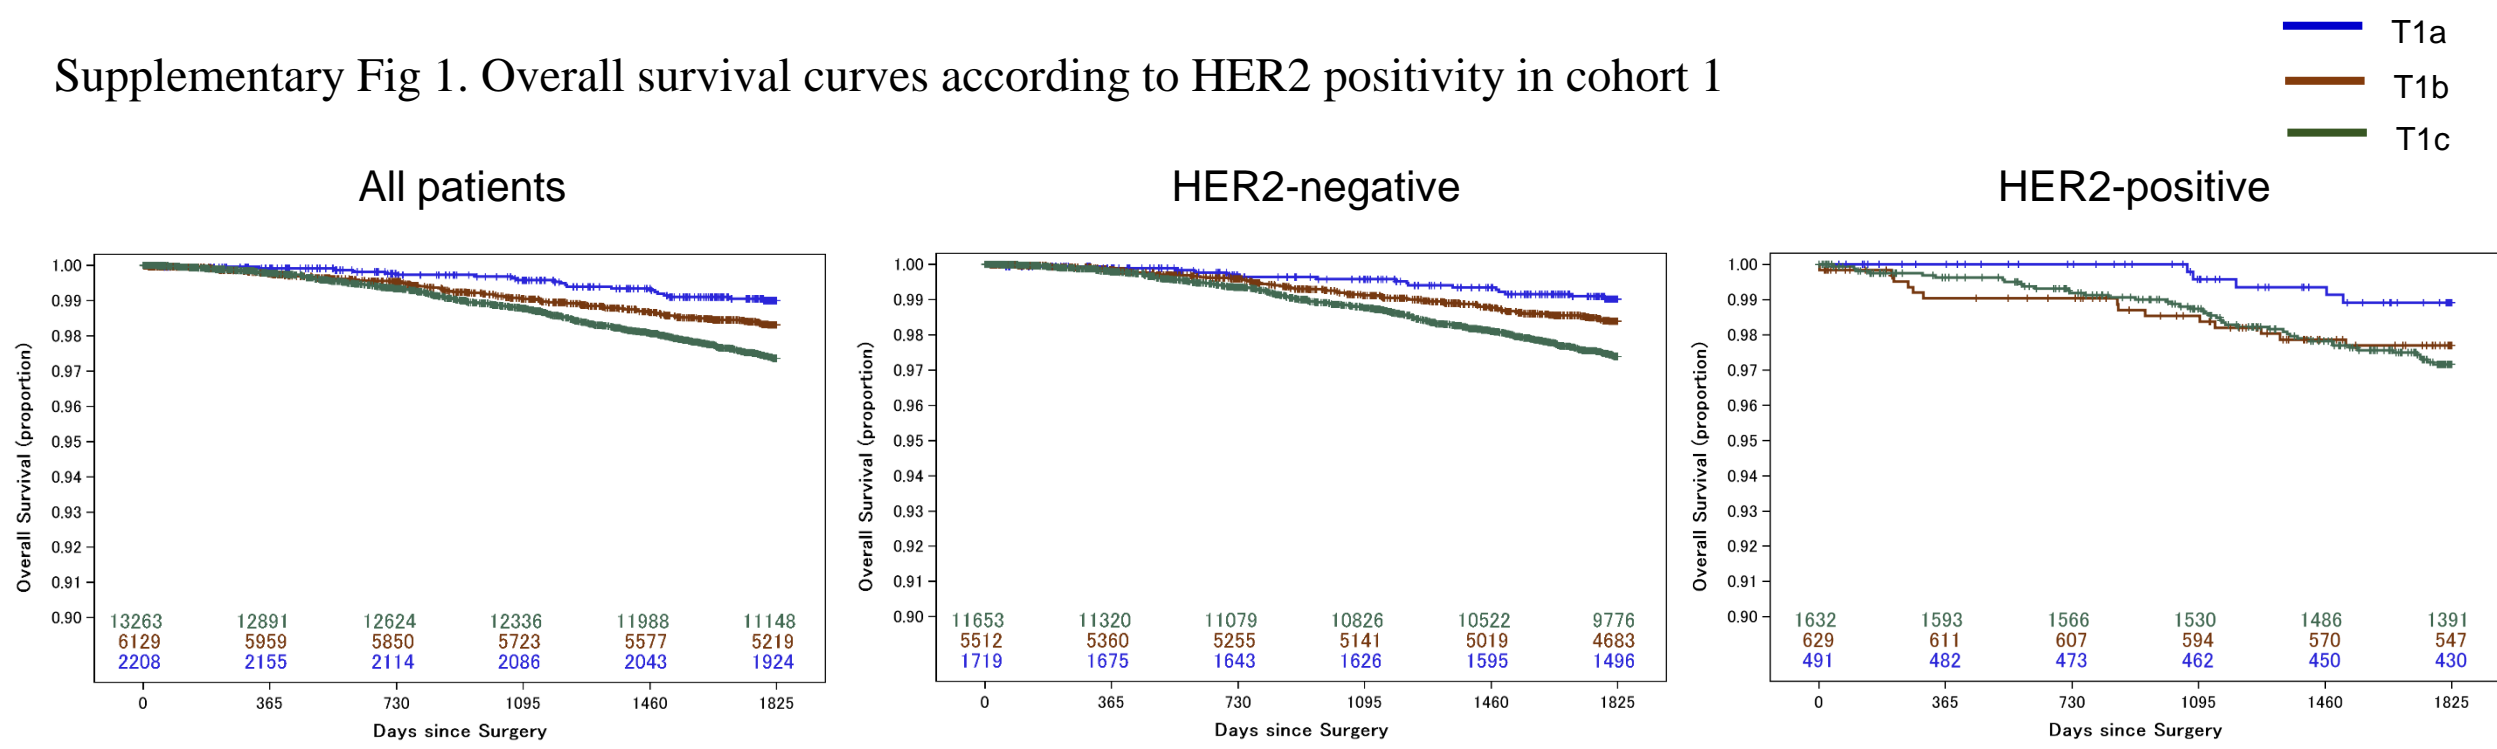

Supplementary Fig 2. Overall survival curves according to subtype classification in cohort 1

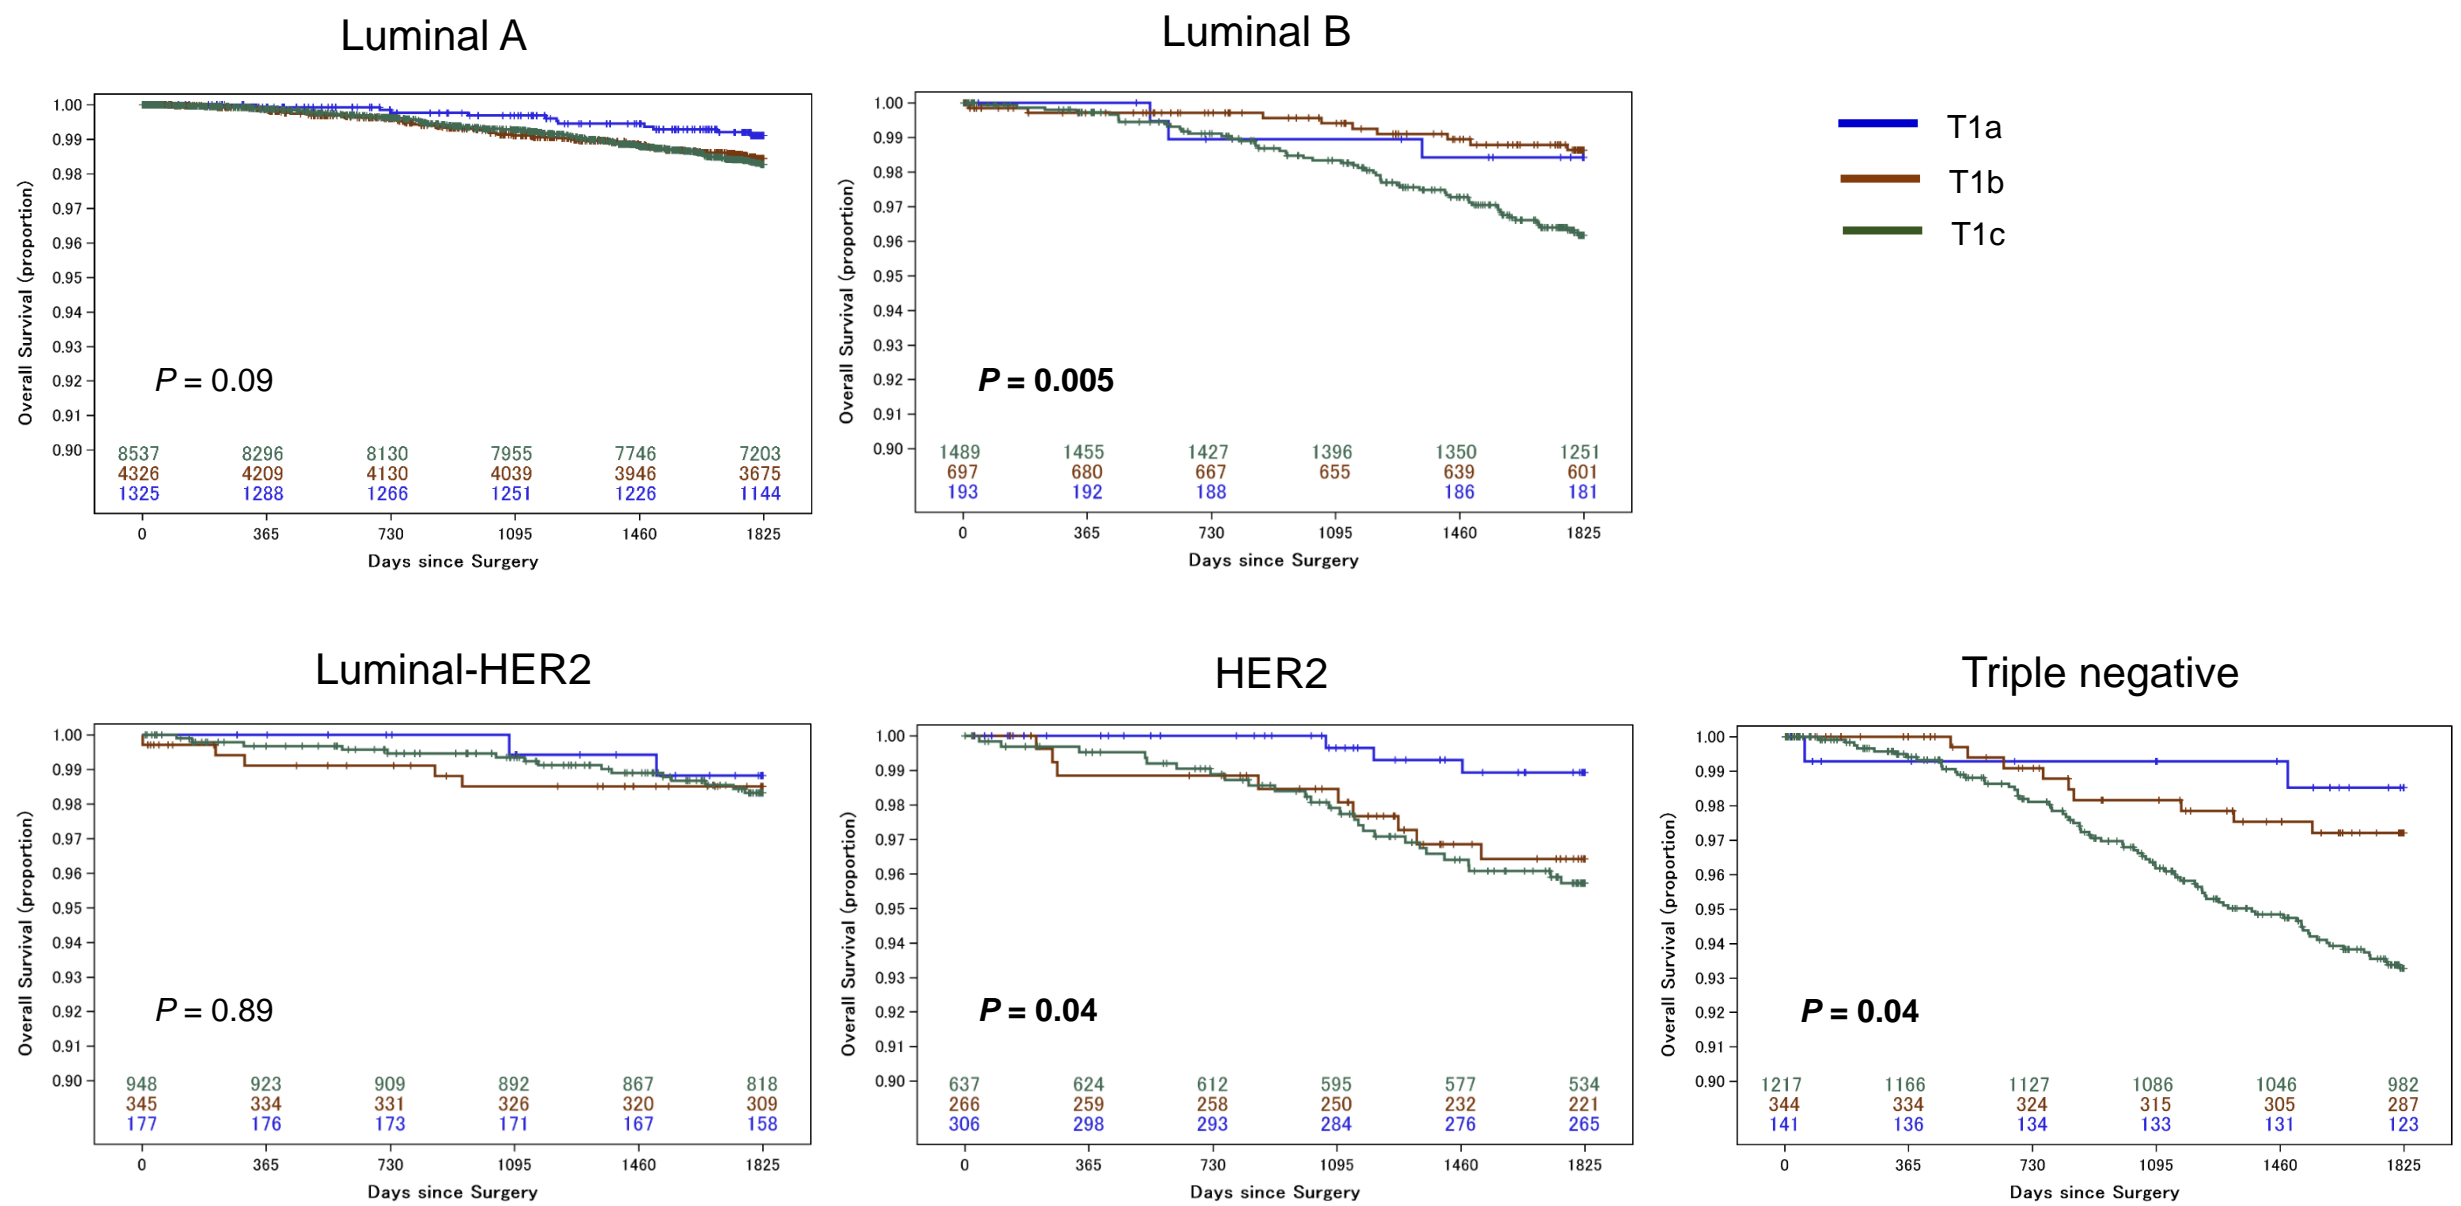

Supplementary Fig 3. Treatment ratio according to tumor size and ER status (A), and according to age at diagnosis and tumor size (B).

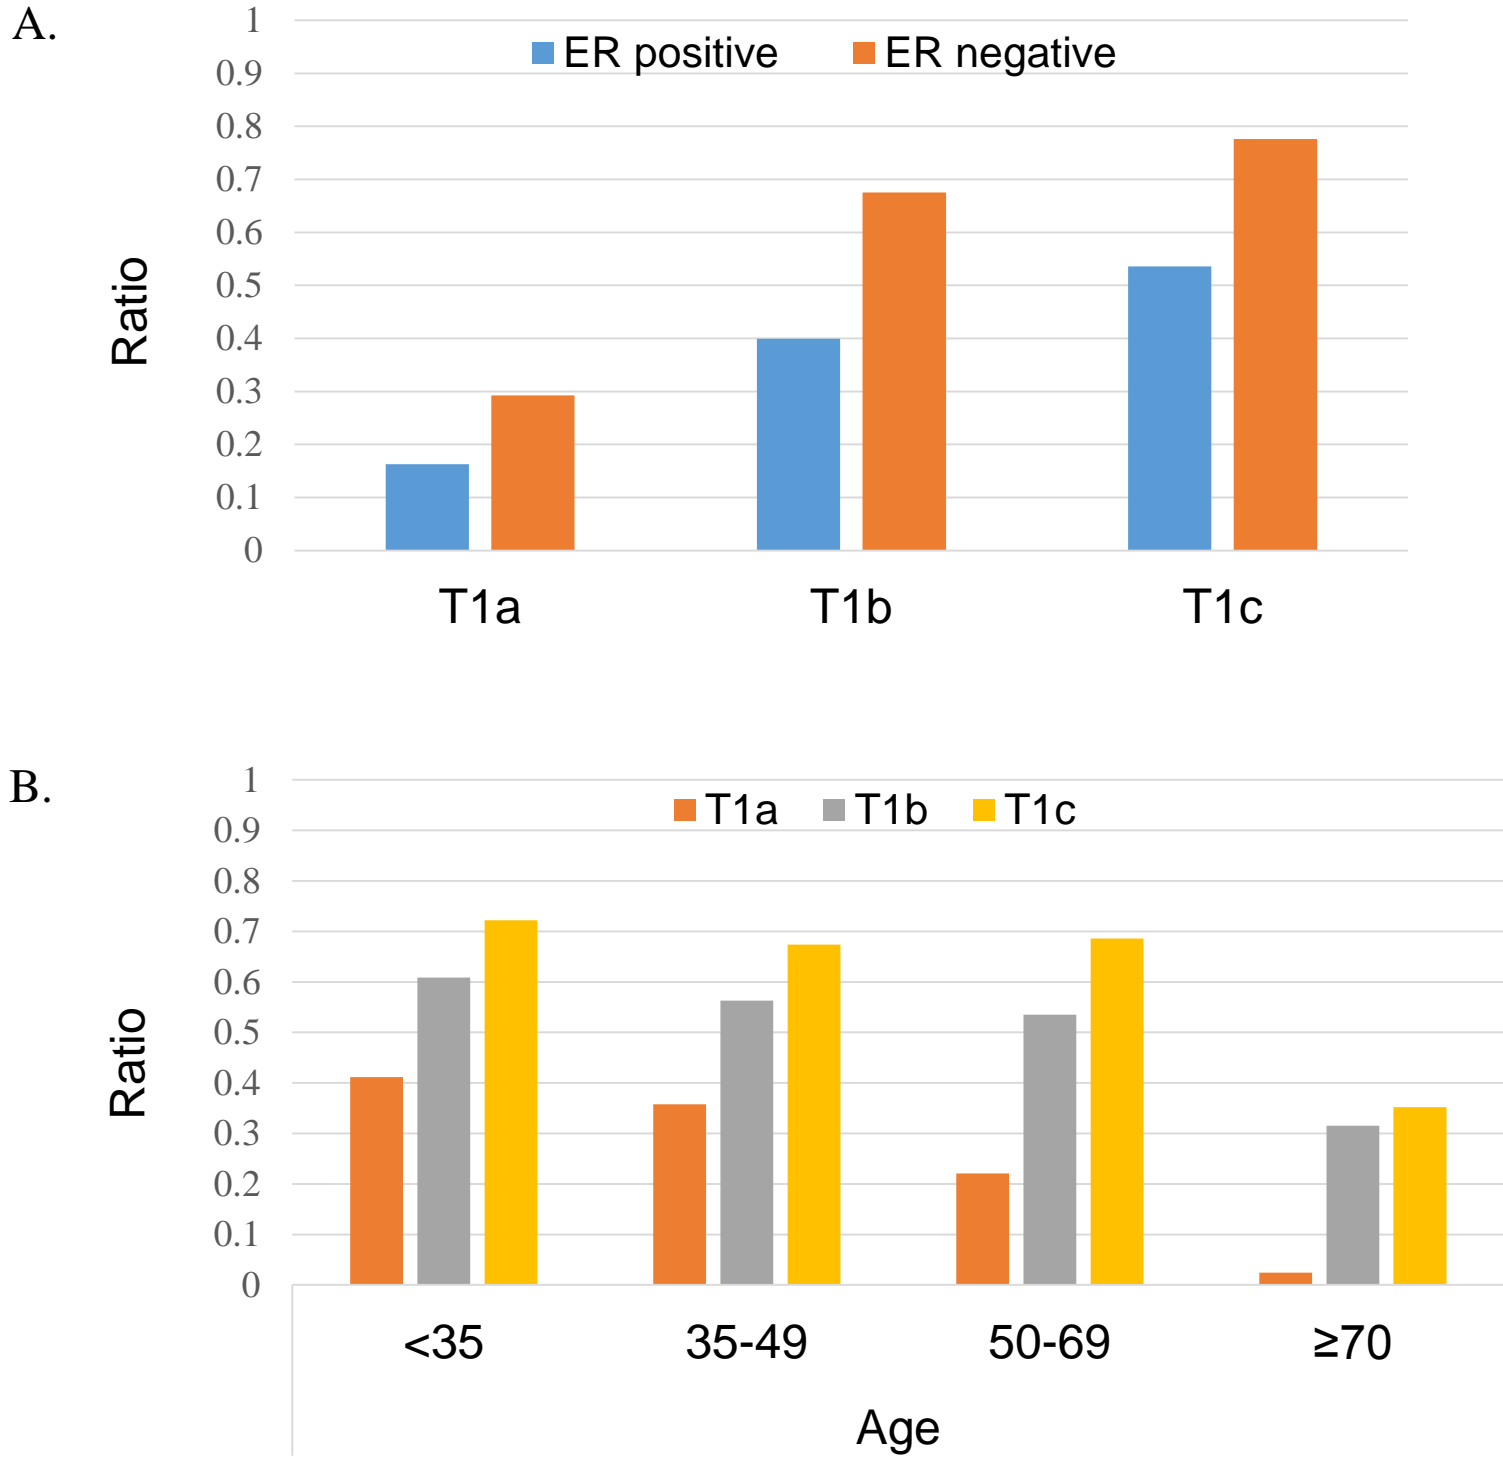

Supplement: MOESM1 [file 17103194]
